# Supplementary material for: Differences in Somatic Mutation Profiles between Korean Gastric Cancer and Gastric Adenoma Patients
Source: MDPI journal article supplement (doi:10.3390/jcm10092038), 2021-05-10
Supplement: s1 [file s1]

**Supplementary Table S1. A list of 135 selected genes associated with gastric cancer or adenoma for next-generation panel sequencing.**

|                |               |                |                 |                |
|----------------|---------------|----------------|-----------------|----------------|
| <i>ABCB1</i>   | <i>CNGA4</i>  | <i>GLI3</i>    | <i>MET</i>      | <i>RASA1</i>   |
| <i>ABL1</i>    | <i>CREBBP</i> | <i>GNAS</i>    | <i>MLH1</i>     | <i>RGNEF</i>   |
| <i>ABCA10</i>  | <i>CTNNA1</i> | <i>GNAQ</i>    | <i>MSH6</i>     | <i>RECQL</i>   |
| <i>ACVR2A</i>  | <i>CTNNA2</i> | <i>GSR</i>     | <i>MTOR</i>     | <i>RET</i>     |
| <i>ADRA1B</i>  | <i>CTNNB1</i> | <i>HSP90B1</i> | <i>MUC6</i>     | <i>RHOA</i>    |
| <i>AKAP9</i>   | <i>CYP2D6</i> | <i>IDH1</i>    | <i>MYC</i>      | <i>RNF43</i>   |
| <i>AKAP13</i>  | <i>DDR2</i>   | <i>ITGAV</i>   | <i>MYH11</i>    | <i>RNF213</i>  |
| <i>ALK</i>     | <i>DLC1</i>   | <i>ITK</i>     | <i>MYST4</i>    | <i>ROS1</i>    |
| <i>APC</i>     | <i>DNAH7</i>  | <i>JAK2</i>    | <i>NSD1</i>     | <i>RYR1</i>    |
| <i>ARHGAP5</i> | <i>DNMT3A</i> | <i>JAK3</i>    | <i>NRAS</i>     | <i>SMAD2</i>   |
| <i>ARID1A</i>  | <i>DRD2</i>   | <i>KAT6B</i>   | <i>NF1</i>      | <i>SMAD4</i>   |
| <i>ATM</i>     | <i>EGFR</i>   | <i>KCNH6</i>   | <i>NOTCH1</i>   | <i>SMARCA4</i> |
| <i>ATRX</i>    | <i>EIF2C4</i> | <i>KDM6A</i>   | <i>NOTCH2</i>   | <i>SMARCB1</i> |
| <i>AURKA</i>   | <i>ELF3</i>   | <i>KDR</i>     | <i>NTRK1</i>    | <i>SMO</i>     |
| <i>BCOR</i>    | <i>EP300</i>  | <i>KIF2B</i>   | <i>PCDH9</i>    | <i>SOHLH2</i>  |
| <i>BNC2</i>    | <i>ERBB2</i>  | <i>KIT</i>     | <i>PDCD1LG2</i> | <i>STK11</i>   |
| <i>BRAF</i>    | <i>ERBB3</i>  | <i>KMT2A</i>   | <i>PIK3CA</i>   | <i>SYNE1</i>   |
| <i>BRCA1</i>   | <i>EYA4</i>   | <i>KMT2B</i>   | <i>PIK3R1</i>   | <i>TGFBR1</i>  |
| <i>BRCA2</i>   | <i>FAM46D</i> | <i>KMT2C</i>   | <i>PKHD1</i>    | <i>TGFBR2</i>  |
| <i>CAT</i>     | <i>FANCM</i>  | <i>KMT2D</i>   | <i>PLB1</i>     | <i>TMPRSS2</i> |
| <i>CCNE1</i>   | <i>FAT4</i>   | <i>KRAS</i>    | <i>PMS2</i>     | <i>TOP1</i>    |
| <i>CD44</i>    | <i>FBXW7</i>  | <i>LDOC1</i>   | <i>POLR3A</i>   | <i>TP53</i>    |
| <i>CD274</i>   | <i>FGFR1</i>  | <i>LRP2</i>    | <i>PRB2</i>     | <i>TYR</i>     |
| <i>CDH1</i>    | <i>FGFR2</i>  | <i>MACF1</i>   | <i>PRKCB</i>    | <i>VEGFA</i>   |
| <i>CDK6</i>    | <i>FGFR3</i>  | <i>MAP2K1</i>  | <i>PTCH1</i>    | <i>ZAN</i>     |
| <i>CDK12</i>   | <i>FLT3</i>   | <i>MAP2K4</i>  | <i>PTEN</i>     | <i>ZIC4</i>    |
| <i>CDKN2A</i>  | <i>GATA3</i>  | <i>MDM2</i>    | <i>PTPRC</i>    | <i>ZNF217</i>  |
